# Supplementary material for: Dexamethasone Suppression Testing in a Contemporary Cohort with Adrenal Incidentalomas in Two U.S. Integrated Healthcare Systems
Source: MDPI journal article supplement (doi:10.3390/biomedicines11123167), 2023-11-28
Supplement: s1 [file s1]

Table S1. Autonomous diagnosis codes and electronic medical record problem list text used to identify adrenal incidentalomas.

| Diagnostic Field                                     | Description                                     |
|------------------------------------------------------|-------------------------------------------------|
| <b>ICD-9 diagnostic code</b>                         |                                                 |
| 227.0                                                | Benign neoplasm of adrenal gland                |
| 237.2                                                | Neoplasm of uncertain behavior of adrenal gland |
| 255.8                                                | Other specified disorders of adrenal glands     |
| 255.9                                                | Unspecified disorder of adrenal glands          |
| <b>ICD-10 diagnostic code</b>                        |                                                 |
| D35.0                                                | Benign neoplasm of adrenal gland                |
| D44.1                                                | Neoplasm of uncertain behavior of adrenal gland |
| E27.8                                                | Other specified disorders of adrenal gland      |
| E27.9                                                | Disorder of adrenal gland, unspecified          |
| <b>Problem list from electronic medical record</b>   |                                                 |
| Adenoma, bilat adrenal glands                        |                                                 |
| Adenoma, left adrenal gland                          |                                                 |
| Adenoma, right adrenal gland                         |                                                 |
| Adrenal incidentaloma                                |                                                 |
| Benign neoplasm, bilat adrenal glands                |                                                 |
| Benign neoplasm, left adrenal gland                  |                                                 |
| Benign neoplasm, right adrenal gland                 |                                                 |
| Bilat adrenal mass                                   |                                                 |
| Hx of adrenal adenoma                                |                                                 |
| Incidentaloma, adrenal gland.                        |                                                 |
| Left adrenal mass                                    |                                                 |
| Right adrenal mass                                   |                                                 |
| Neoplasm of uncertain behavior, bilat adrenal glands |                                                 |
| Neoplasm of uncertain behavior, left adrenal gland   |                                                 |
